# Supplementary material
Source: HighWire-hosted journal article supplement (https://bmjopenquality.bmj.com/content/7/4/e000433)
Supplement: inline-supplementary-material-1 [file inline-supplementary-material-1.docx]

**Questionnaire items by Scale**

**1.** On which patient care unit you spend the most time? Unit name: ­­­­­­­­­­­­­­­­­­­­__________________________

**2.** For how long have you been working on this unit?

❒ 6-24 months

❒ 2-5 years

❒ > 5 years

**3. Safety Climate [items a-d=Senior leadership support for safety; items e-f=supervisory leadership for safety]**

We are looking for your perceptions and opinions of these safety issues. While thinking about your unit, indicate the extent to which you agree or disagree with each of the following statement.

|  | **Strongly Disagree** | **Disagree** | **Neutral** | **Agree** | **Strongly Agree** | **N/A** |
| --- | --- | --- | --- | --- | --- | --- |
| 1. Senior management has a clear picture of the risk associated with patient care | ❒ | ❒ | ❒ | ❒ | ❒ | ❒ |
| 1. Patient safety decisions are made at the proper level by the most qualified people | ❒ | ❒ | ❒ | ❒ | ❒ | ❒ |
| 1. Senior management provides a climate that promotes patient safety | ❒ | ❒ | ❒ | ❒ | ❒ | ❒ |
| 1. Senior management considers patient safety when program changes are discussed | ❒ | ❒ | ❒ | ❒ | ❒ | ❒ |
| 1. My supervisor/manager says a good word when he/she sees a job done according to established patient safety procedures | ❒ | ❒ | ❒ | ❒ | ❒ | ❒ |
| 1. My supervisor/manager seriously considers staff suggestions for improving patient safety | ❒ | ❒ | ❒ | ❒ | ❒ | ❒ |

**4. Teamwork Climate**

Please think about the unit where you work most when responding to the following statements.

|  | **Strongly Disagree** | **Disagree** | **Neutral** | **Agree** | **Strongly Agree** | **N/A** |
| --- | --- | --- | --- | --- | --- | --- |
| 1. It is easy for personnel in this unit to ask questions when there is something that they do not understand. | ❒ | ❒ | ❒ | ❒ | ❒ | ❒ |
| 1. I have the support I need from other personnel to care for patients. | ❒ | ❒ | ❒ | ❒ | ❒ | ❒ |
| 1. Team input is well received in this unit. | ❒ | ❒ | ❒ | ❒ | ❒ | ❒ |
| 1. In this unit, it is difficult to Speak Up if I perceive a problem with patient care. | ❒ | ❒ | ❒ | ❒ | ❒ | ❒ |
| 1. Disagreements in this unit are resolved appropriately (i.e., not *who* is right, but *what* is best for the patient). | ❒ | ❒ | ❒ | ❒ | ❒ | ❒ |
| 1. The physicians and nurses and other team members here work together as a well-coordinated team. | ❒ | ❒ | ❒ | ❒ | ❒ | ❒ |

**5. Overall Perceptions of Patient Safety**

Please think about the unit where you work most when responding to the following statements.

|  | **Strongly Disagree** | **Disagree** | **Neutral** | **Agree** | **Strongly Agree** |
| --- | --- | --- | --- | --- | --- |
| 1. Patient safety is never sacrificed to get more work done | ❒ | ❒ | ❒ | ❒ | ❒ |
| 1. Our procedures and systems are good at preventing errors from happening | ❒ | ❒ | ❒ | ❒ | ❒ |
| 1. It is just by chance that more serious mistakes don't happen around here | ❒ | ❒ | ❒ | ❒ | ❒ |
| 1. We have patient safety problems in this unit | ❒ | ❒ | ❒ | ❒ | ❒ |

**5. Demographic Information:**

| **Profession:**  **Gender:**  ❒Female ❒ Registered Practical Nurse (RPN)  ❒ Male ❒ Registered Nurse (RN)  ❒ Nurse Practitioner (NP)  ❒ Allied Health Professional (AHP)  ❒ Clerical Staff  ❒ Other: ___________ |
| --- |

***– Thank you for completing this questionnaire –***
